# Supplementary material for: Interaction between Bacteria and the Immune System for Cancer Immunotherapy: The α-GalCer Alliance
Source: MDPI journal article supplement (doi:10.3390/ijms23115896), 2022-05-24
Supplement: s1 [file s1]

**Table S1.** Association between Stages and OS for all species.

| COAD                                                                |         |           |          |
|---------------------------------------------------------------------|---------|-----------|----------|
| Condition                                                           | p-value | n present | n absent |
| <i>Bacteroides fragilis</i> : present vs. absent                    | 0.6     | 241       | 195      |
| <i>Bacteroides vulgatus</i> : present vs. absent                    | 0.5     | 286       | 150      |
| <i>Prevotella copri</i> : present vs. absent                        | 0.4     | 123       | 313      |
| <i>Bacteroides fragilis</i> : present vs. absent in tumor stage I   | 0.9     | 41        | 32       |
| <i>Bacteroides vulgatus</i> : present vs. absent in tumor stage I   | 0.9     | 55        | 18       |
| <i>Prevotella copri</i> : present vs. absent in tumor stage I       | 0.2     | 18        | 55       |
| <i>Bacteroides fragilis</i> : present vs. absent in tumor stage II  | 0.09    | 96        | 70       |
| <i>Bacteroides vulgatus</i> : present vs. absent in tumor stage II  | 0.9     | 108       | 58       |
| <i>Prevotella copri</i> : present vs. absent in tumor stage II      | 0.4     | 53        | 113      |
| <i>Bacteroides fragilis</i> : present vs. absent in tumor stage III | 0.8     | 64        | 60       |
| <i>Bacteroides vulgatus</i> : present vs. absent in tumor stage III | 0.2     | 78        | 46       |
| <i>Prevotella copri</i> : present vs. absent in tumor stage III     | 0.2     | 36        | 88       |
| <i>Bacteroides fragilis</i> : present vs. absent in tumor stage IV  | 0.3     | 35        | 30       |
| <i>Bacteroides vulgatus</i> : present vs. absent in tumor stage IV  | 0.04    | 41        | 24       |
| <i>Prevotella copri</i> : present vs. absent in tumor stage IV      | 0.1     | 16        | 49       |

| READ                                                                |         |           |          |
|---------------------------------------------------------------------|---------|-----------|----------|
| Condition                                                           | p-value | n present | n absent |
| <i>Bacteroides fragilis</i> : present vs. absent                    | 0.6     | 60        | 98       |
| <i>Bacteroides vulgatus</i> : present vs. absent                    | 0.5     | 85        | 73       |
| <i>Prevotella copri</i> : present vs. absent                        | 0.5     | 44        | 114      |
| <i>Bacteroides fragilis</i> : present vs. absent in tumor stage I   | 0.2     | 13        | 19       |
| <i>Bacteroides vulgatus</i> : present vs. absent in tumor stage I   | 0.4     | 24        | 8        |
| <i>Prevotella copri</i> : present vs. absent in tumor stage I       | 0.4     | 6         | 26       |
| <i>Bacteroides fragilis</i> : present vs. absent in tumor stage II  | 0.5     | 14        | 34       |
| <i>Bacteroides vulgatus</i> : present vs. absent in tumor stage II  | 0.9     | 21        | 27       |
| <i>Prevotella copri</i> : present vs. absent in tumor stage II      | 0.2     | 14        | 34       |
| <i>Bacteroides fragilis</i> : present vs. absent in tumor stage III | 0.4     | 20        | 27       |
| <i>Bacteroides vulgatus</i> : present vs. absent in tumor stage III | 0.9     | 22        | 25       |
| <i>Prevotella copri</i> : present vs. absent in tumor stage III     | 0.2     | 15        | 32       |
| <i>Bacteroides fragilis</i> : present vs. absent in tumor stage IV  | 0.5     | 10        | 16       |
| <i>Bacteroides vulgatus</i> : present vs. absent in tumor stage IV  | 0.3     | 14        | 12       |
| <i>Prevotella copri</i> : present vs. absent in tumor stage IV      | 0.2     | 8         | 18       |
